# Supplementary material for: K-looping catalytic pyrolysis of unaltered and pelletized biomass for in situ tar reduction and porous carbon production
Source: Royal Society of Chemistry journal article supplement (doi:10.1039/c8se00419f), 2018-01-01
Supplement: c8se00419f1.pdf [file c8se00419f1.pdf]

# **K-looping Catalytic Pyrolysis of the Original and Pelletized Biomass for In-situ Tar Reduction and Porous Carbons Production**

Yafei Shen\*

*Jiangsu Key Laboratory of Atmospheric Environment Monitoring and Pollution Control (AEMPC),  
School of Environmental Science and Engineering, Nanjing University of Information Science &  
Technology, Nanjing 210044, China*

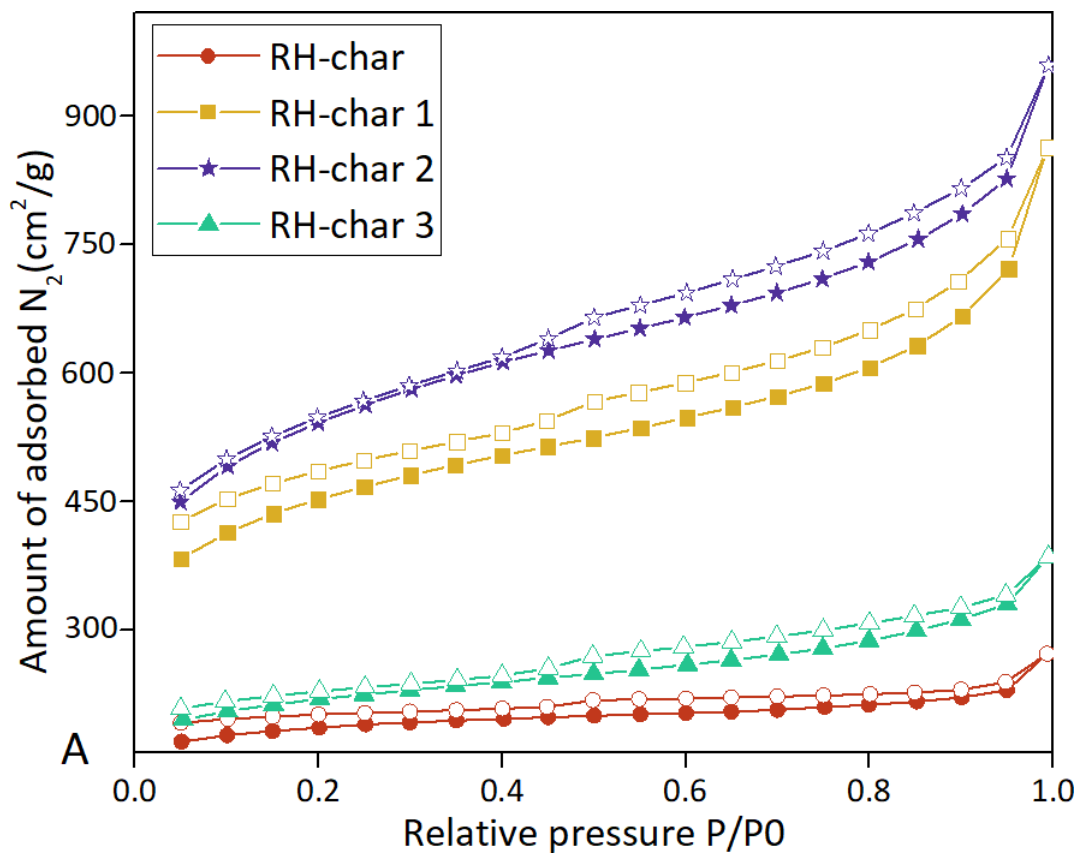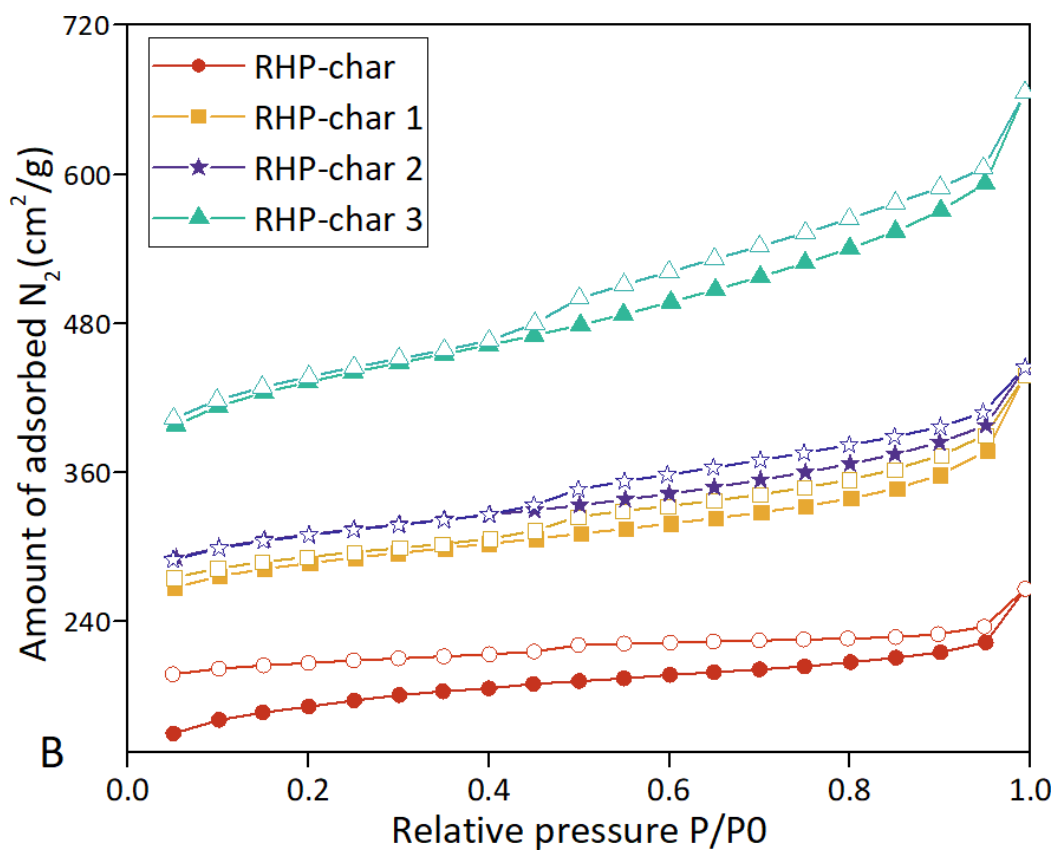

Fig. S1  $N_2$  adsorption-desorption isotherms of the RH-chars and RHP-chars

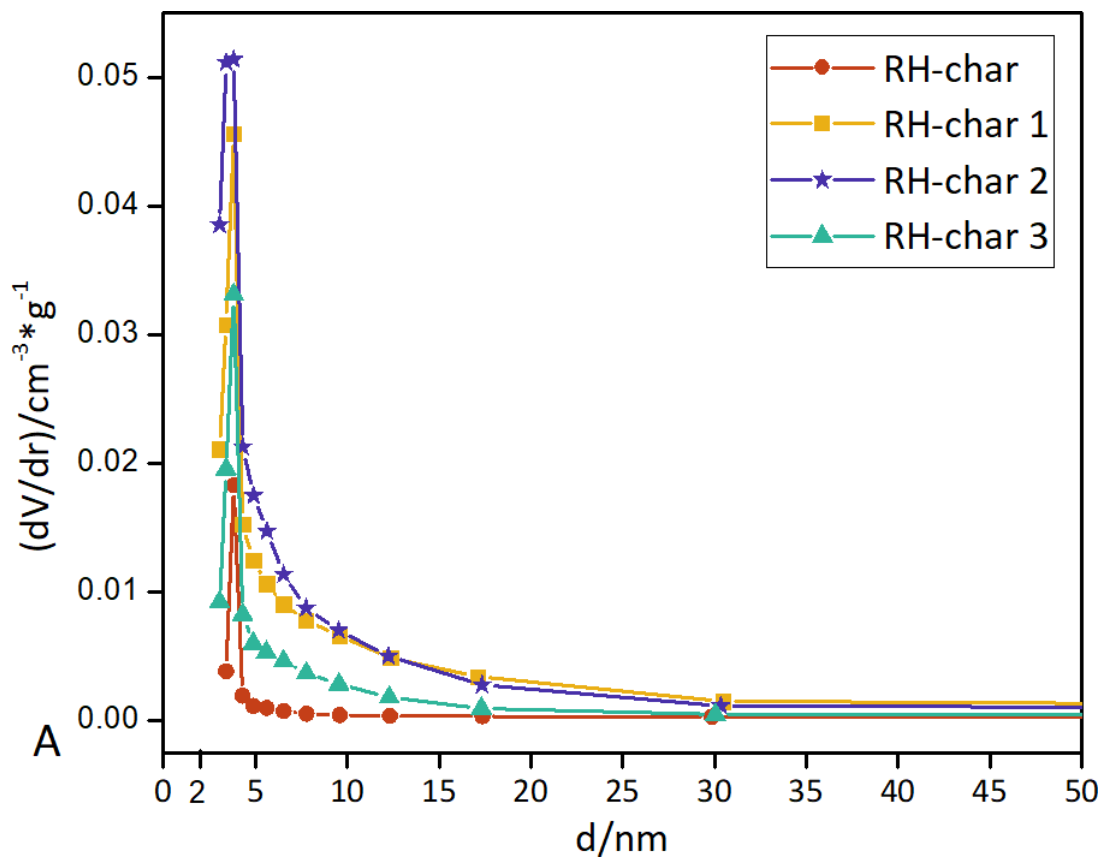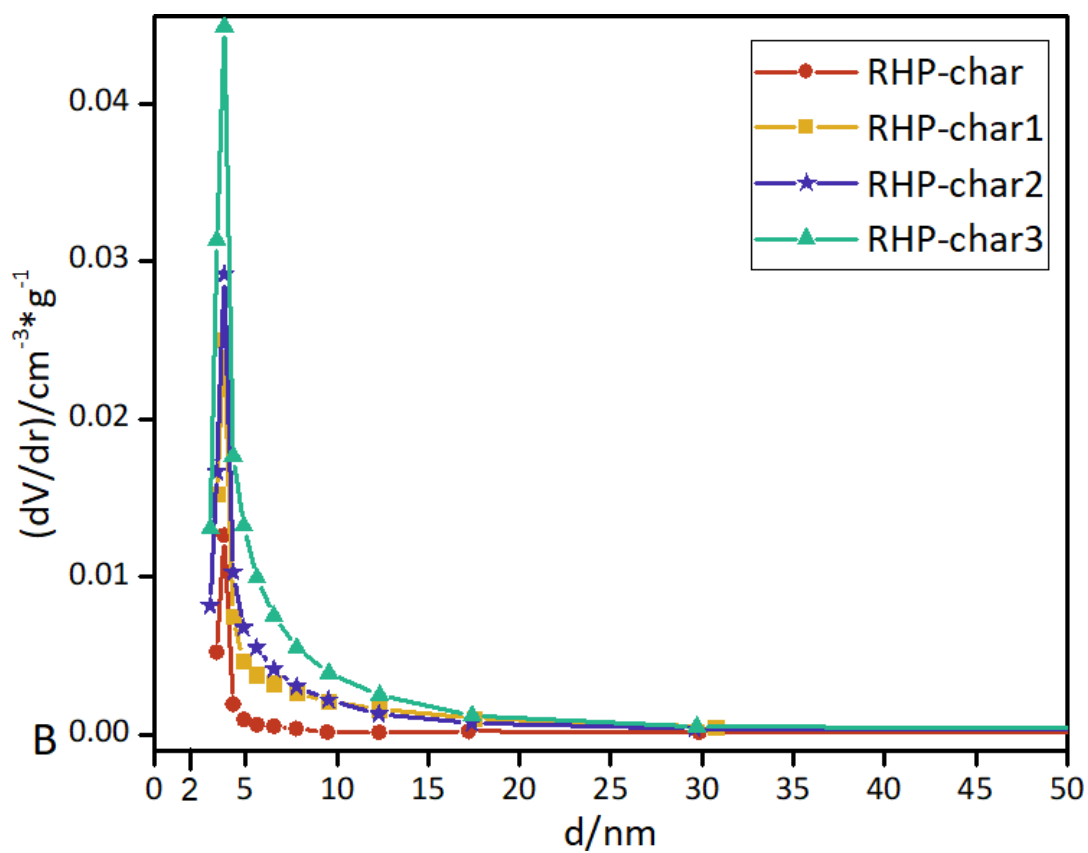

Fig. S2 Pore size distributions calculated from the desorption isotherms of the RH-chars and RHP-chars

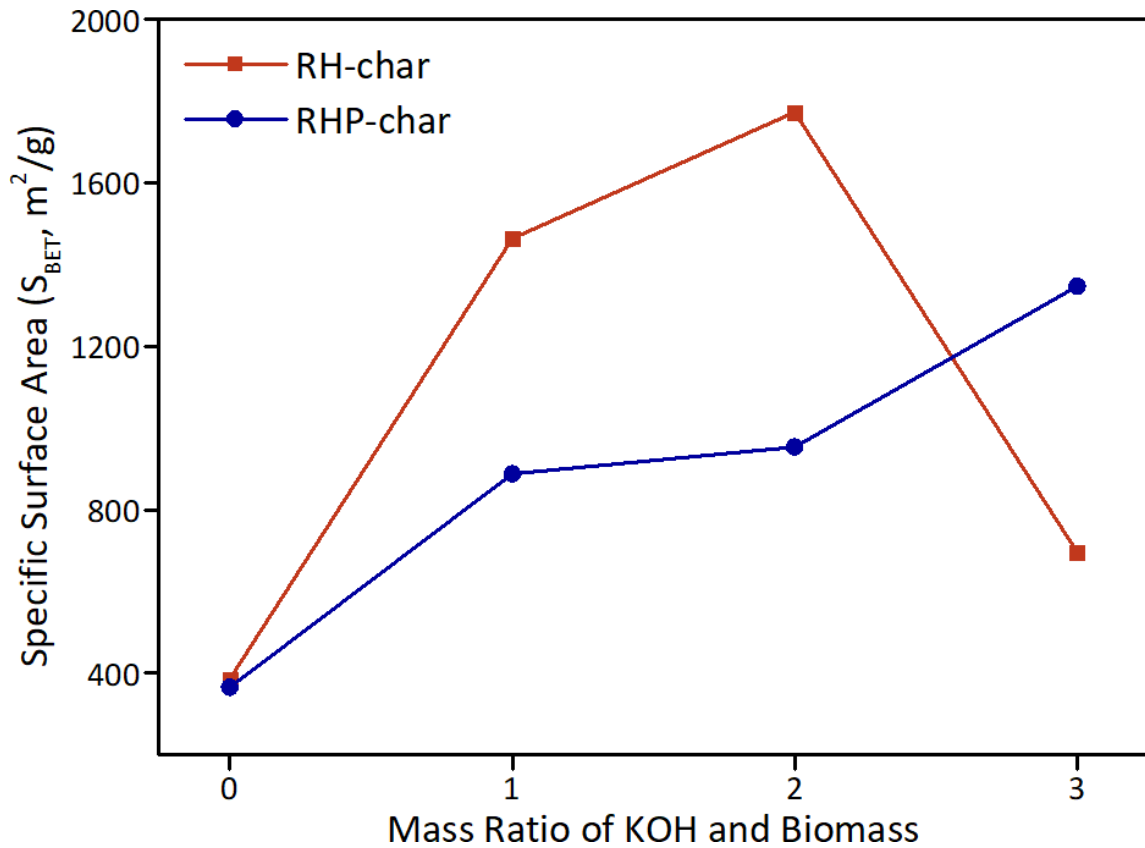

Fig. S3 Specific surface area ( $S_{BET}$ ) of RH and RHP derived chars

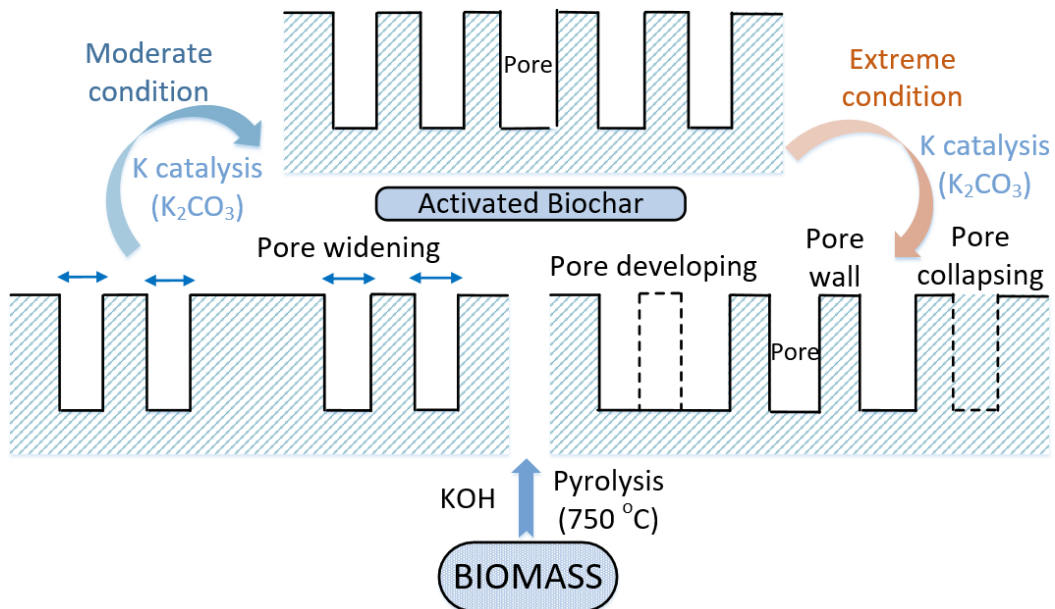

Fig. S4 Mechanism of activated biochar production via co-pyrolysis biomass with KOH

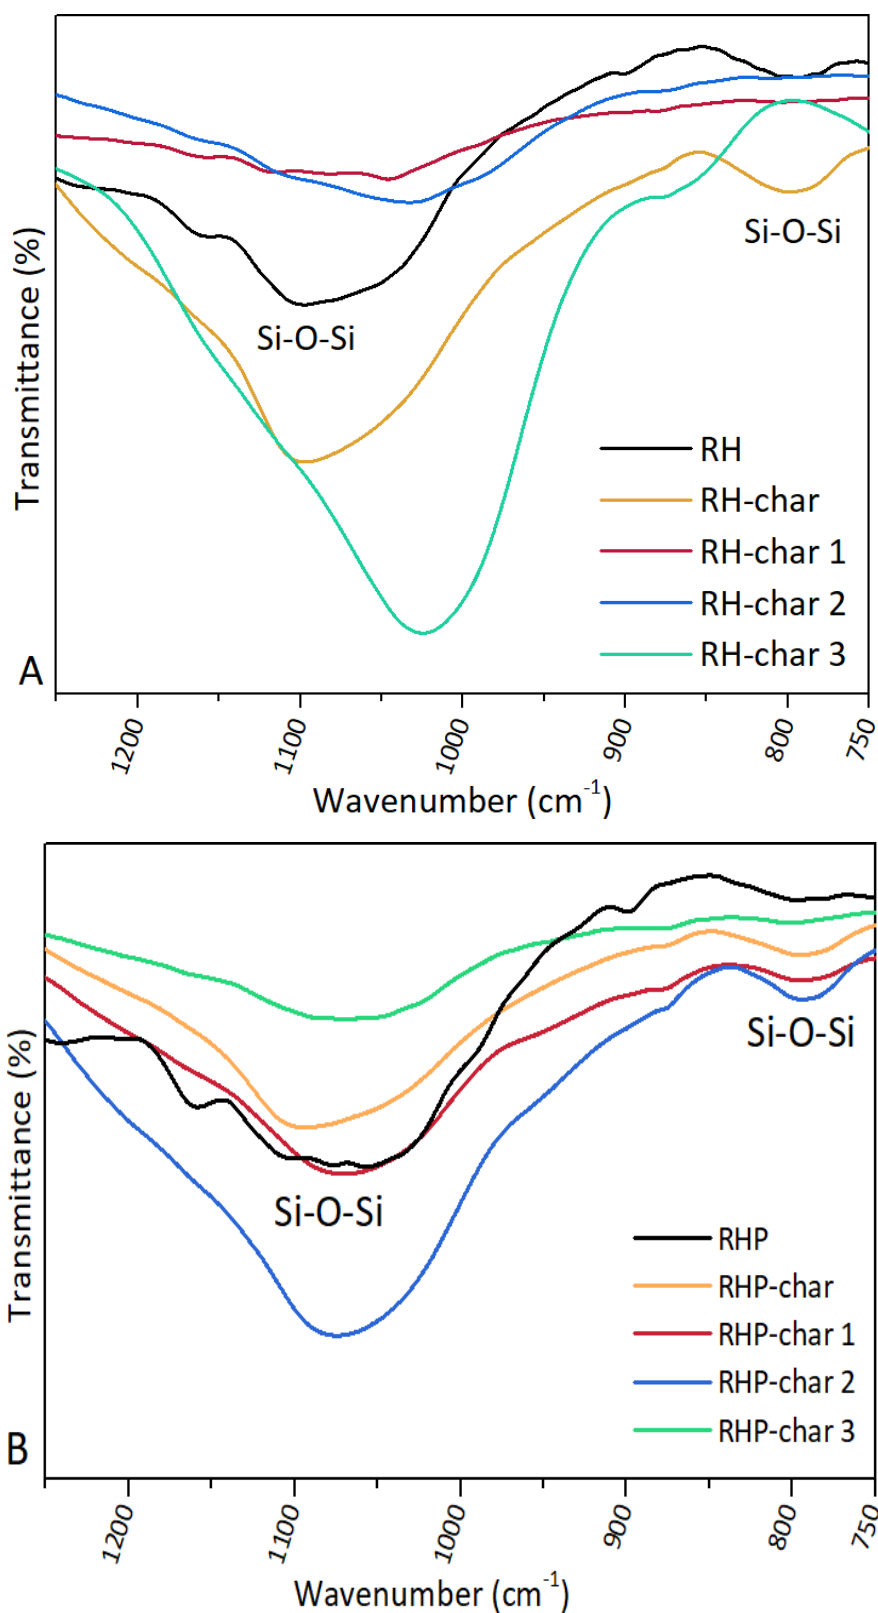

Fig. S5 IR spectrum (750-1250  $\text{cm}^{-1}$ ) of biomass and bio-char from RH (A) and RHP (B)
